# Supplementary material for: Effects of Humic Acids on the Ecotoxicity of Fe3O4 Nanoparticles and Fe-Ions: Impact of Oxidation and Aging
Source: PubMed Central journal article supplement (PMC7600131; doi:10.3390/nano10102011), 2020-10-12
Supplement: nanomaterials-10-02011-s001.pdf [file nanomaterials-10-02011-s001.pdf]

*Supplementary Materials*

# Effects of Humic Acids on the Ecotoxicity of Fe<sub>3</sub>O<sub>4</sub> Nanoparticles and Fe-Ions: Impact of Oxidation and Aging

**Lyubov Bondarenko <sup>1,\*</sup>, Anne Kahru <sup>2</sup>, Vera Terekhova <sup>3,5</sup>, Gulzhian Dzhardimalieva <sup>1,4</sup>, Pavel Uchanov <sup>5</sup> and Kamila Kydralieva <sup>1</sup>**

<sup>1</sup> Moscow Aviation Institute, National Research University, 125993 Moscow, Russia; dzhardim@icp.ac.ru (G.D.); KydralievaKA@mai.ru (K.K.)

<sup>2</sup> Laboratory of Environmental Toxicology, National Institute of Chemical Physics and Biophysics, 12618 Tallinn, Estonia; anne.kahru@kbfi.ee

<sup>3</sup> Laboratory of Ecotoxicological Analysis of Soil, Faculty of Soil Science, Lomonosov Moscow State University, 119991 Moscow, Russia; vterekhova@gmail.com

<sup>4</sup> Laboratory of Metallopolymers, Polymers and Composite Materials Department, Institute of Problems of Chemical Physics RAS, 142432 Chernogolovka, Moscow region, Russia

<sup>5</sup> The Laboratory of Ecological Functions of Soil, Institute of Ecology and Evolution, RAS, 119071 Moscow, Russia; p.uchanov@gmail.com

\* Correspondence: BondarenkoLS@mai.ru Tel.: +7-901-743-3454

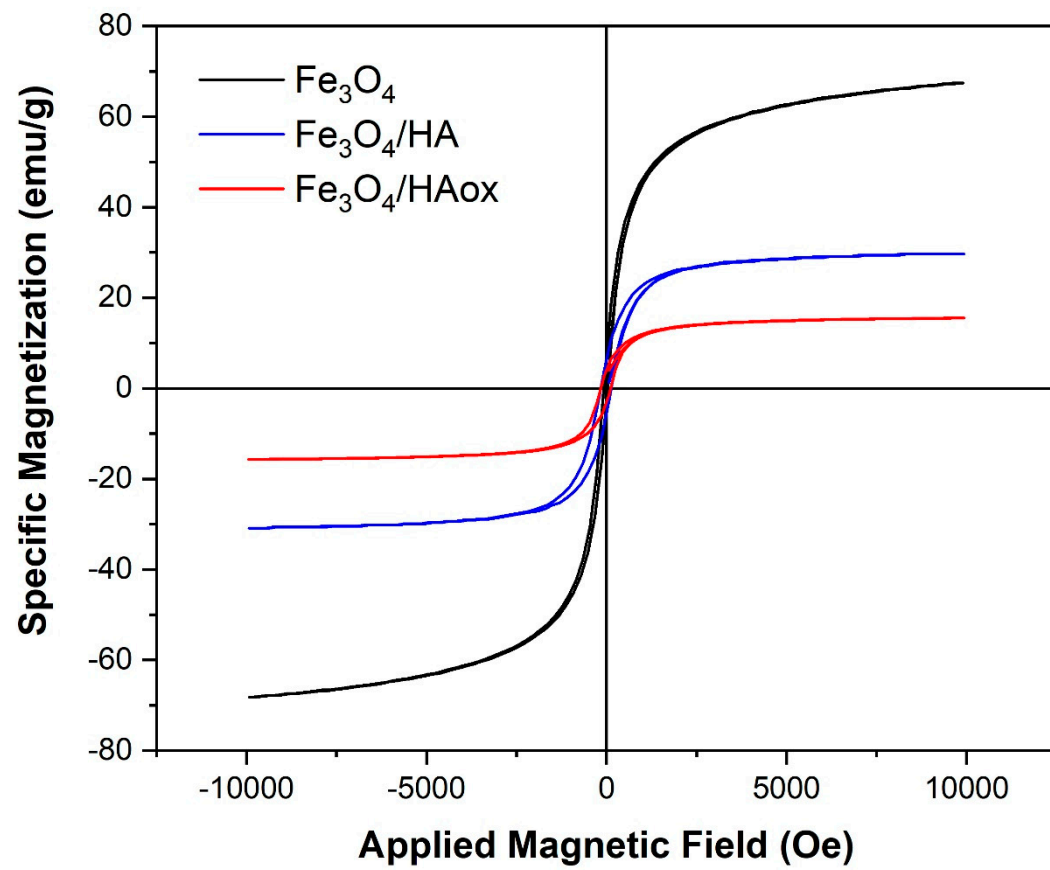

Figure S1.

**Table S1.** Exposure concentration (mg Fe/L) and concentration for soluble Fe-salt and studied MNPs (mg/L, without color).

| Samples                                                                                                                                                                                           | Ciliates          |       |        |        |         |         |          |          |
|---------------------------------------------------------------------------------------------------------------------------------------------------------------------------------------------------|-------------------|-------|--------|--------|---------|---------|----------|----------|
|                                                                                                                                                                                                   | 0.25%             | 0.05% | 0.025% | 0.005% | 0.0025% | 0.0005% | 0.00025% | 0.00005% |
| Fe <sup>2+</sup>                                                                                                                                                                                  | 745               | 149   | 74.5   | 14.9   | 7.45    | 1.49    | 0.745    | 0.149    |
| Fe <sup>3+</sup>                                                                                                                                                                                  | 770               | 154   | 77     | 15.4   | 7.7     | 1.54    | 0.77     | 0.154    |
| FeCl <sub>2</sub> , FeCl <sub>3</sub>                                                                                                                                                             | 1650              | 330   | 165    | 33     | 16.5    | 3.3     | 1.65     | 0.33     |
| Fe <sup>2+</sup> /Fe <sup>3+</sup>                                                                                                                                                                | -                 | -     | -      | 15.1   | 7.55    | 1.51    | 0.76     | 0.151    |
| FeCl <sub>2</sub> /FeCl <sub>3</sub>                                                                                                                                                              |                   |       |        | 33     | 16.5    | 3.3     | 1.65     | 0.33     |
| Fe(II)HA                                                                                                                                                                                          | -                 | -     | -      | 14.9   | 7.45    | 1.49    | 0.745    | 0.149    |
| Fe(III)HA                                                                                                                                                                                         | -                 | -     | -      | 15.4   | 7.7     | 1.54    | 0.77     | 0.154    |
| Fe(II,III)HA                                                                                                                                                                                      | -                 | -     | -      | 15.1   | 7.55    | 1.51    | 0.76     | 0.151    |
| Salt with HA                                                                                                                                                                                      | -                 | -     | -      | 33     | 16.5    | 3.3     | 1.65     | 0.33     |
| Fe <sup>2+</sup> /Fe <sup>3+</sup> (90 days)                                                                                                                                                      | 755               | 151   | 75.5   | 15.1   | 7.55    | 1.51    | 0.76     | 0.151    |
| Fe(II,III)HA (90 days)                                                                                                                                                                            | 755               | 151   | 75.5   | 15.1   | 7.55    | 1.51    | 0.76     | 0.151    |
| FeCl <sub>2</sub> /FeCl <sub>3</sub> (90 days), FeCl <sub>2</sub> /FeCl <sub>3</sub> /HA (90 days)                                                                                                | 1650              | 330   | 165    | 33     | 16.5    | 3.3     | 1.65     | 0.33     |
| Fe <sub>3</sub> O <sub>4</sub> , Fe <sub>3</sub> O <sub>4</sub> /HA, Fe <sub>3</sub> O <sub>4</sub> (90 days), Fe <sub>3</sub> O <sub>4</sub> /HA (90 days), Fe <sub>3</sub> O <sub>4</sub> /HAox | -                 | -     | -      | 33     | 16.5    | 3.3     | 1.65     | 0.33     |
| HA, HA (90 days)                                                                                                                                                                                  | -                 | -     | -      | 33     | 16.5    | 3.3     | 1.65     | -        |
| Samples                                                                                                                                                                                           | The higher plants |       |        |        |         |         |          |          |
|                                                                                                                                                                                                   | 0.5%              | 0.25% | 0.05%  | 0.025% | 0.005%  |         | 0.0005%  |          |
| Fe <sup>2+</sup>                                                                                                                                                                                  | 1490              | 745   | 149    | 74.5   | 14.9    |         | 1.49     |          |
| Fe <sup>3+</sup>                                                                                                                                                                                  | 1540              | 770   | 154    | 77     | 15.4    |         | 1.54     |          |
| Fe <sup>2+</sup> /Fe <sup>3+</sup>                                                                                                                                                                | 1510              | 755   | 151    | 75.5   | 15.1    |         | 1.51     |          |
| Fe(II)HA                                                                                                                                                                                          | 1490              | 745   | 149    | 74.5   | 14.9    |         | 1.49     |          |
| Fe(III)HA                                                                                                                                                                                         | 1540              | 770   | 154    | 77     | 15.4    |         | 1.54     |          |
| Fe(II,III)HA                                                                                                                                                                                      | 1510              | 755   | 151    | 75.5   | 15.1    |         | 1.51     |          |
| Fe <sup>2+</sup> /Fe <sup>3+</sup> (90 days), Fe(II,III)HA (90 days)                                                                                                                              | 1510              | 755   | 151    | 75.5   | 15.1    |         | 1.51     |          |
| Salts and others samples                                                                                                                                                                          | 3300              | 1650  | 330    | 165    | 33      |         | 16.5     |          |

**Table S2.** p-Values calculated with R using ANOVA for the toxicity of MNPs and Fe-ions to *P. caudatum* and *S. alba*.

| Sample                                | concentration | p-value                            |        |                                    |        |
|---------------------------------------|---------------|------------------------------------|--------|------------------------------------|--------|
|                                       |               | samples                            |        |                                    |        |
| Toxicity to <i>P. caudatum</i> (mg/L) |               |                                    |        |                                    |        |
| Fe <sup>2+</sup>                      | 0.0001        | Fe <sup>2+</sup>                   | >0.05  | Fe <sup>2+</sup>                   | 0.0001 |
| Fe <sup>3+</sup>                      | 0.0001        | Fe <sup>3+</sup>                   |        | HA                                 |        |
| Fe <sup>2+</sup> /Fe <sup>3+</sup>    | >0.05         | Fe <sup>2+</sup> /Fe <sup>3+</sup> | 0.0001 | Fe(II)HA                           |        |
| Fe <sub>3</sub> O <sub>4</sub>        | 0.001         | Fe <sub>3</sub> O <sub>4</sub>     |        | Fe <sup>3+</sup>                   |        |
| HA                                    | 0.01          | Fe <sub>3</sub> O <sub>4</sub>     |        | HA                                 | 0.0001 |
| Fe(II)HA                              | 0.001         | HA                                 | 0.01   | Fe(III)HA                          |        |
| Fe(III)HA                             | 0.001         | Fe <sub>3</sub> O <sub>4</sub> /HA |        | Fe <sup>2+</sup> /Fe <sup>3+</sup> |        |
| Fe(II,III)HA                          | >0.05         | Fe(II,III)HA                       | >0.05  | HA                                 | 0.0001 |
| Fe <sub>3</sub> O <sub>4</sub> /HA    | 0.0001        | Fe <sub>3</sub> O <sub>4</sub> /HA |        | Fe(II,III)HA                       |        |
| Toxicity to <i>S. alba</i> (mg/L)     |               |                                    |        |                                    |        |
| Fe <sup>2+</sup>                      | 0.0001        | Fe <sup>2+</sup>                   | 0.001  | Fe <sup>2+</sup>                   | 0.0001 |
| Fe <sup>3+</sup>                      | 0.0001        | Fe <sup>3+</sup>                   |        | HA                                 |        |
| Fe <sup>2+</sup> /Fe <sup>3+</sup>    | 0.0001        | Fe <sup>2+</sup> /Fe <sup>3+</sup> | 0.0001 | Fe(II)HA                           |        |
| Fe <sub>3</sub> O <sub>4</sub>        | >0.05         | Fe <sub>3</sub> O <sub>4</sub>     |        | Fe <sup>3+</sup>                   |        |
| HA                                    | 0.0001        | Fe <sub>3</sub> O <sub>4</sub>     | 0.0001 | HA                                 | 0.0001 |
| HA/Fe <sup>2+</sup>                   | 0.001         | HA                                 |        | HA/Fe <sup>3+</sup>                |        |
| HA/Fe <sup>3+</sup>                   | 0.0001        | Fe <sub>3</sub> O <sub>4</sub> /HA |        | Fe <sup>2+/3+</sup>                |        |
| Fe(II,III)HA                          | 0.0001        | HA/Fe <sup>2+/3+</sup>             | 0.01   | HA                                 | 0.0001 |
| Fe <sub>3</sub> O <sub>4</sub> /HA    | 0.0001        | Fe <sub>3</sub> O <sub>4</sub> /HA |        | Fe(II,III)HA                       |        |

**Table S3.** p-Values for the toxicity (EC50) of humic acids, as prepared and aged Fe<sup>2+</sup>/Fe<sup>3+</sup> ions to *P. caudatum* and *S. alba*.

| Sample                                              | p-value        |         |
|-----------------------------------------------------|----------------|---------|
|                                                     | concentrations | samples |
| Toxicity to ciliates <i>P. caudatum</i> (24 h EC50) |                |         |
| HA*                                                 | 0.01           | 0.0001  |
| HA* (90 days)                                       | 0.001          |         |
| Fe <sup>2+</sup> /Fe <sup>3+</sup>                  | >0.05          | >0.05   |
| Fe <sup>2+</sup> /Fe <sup>3+</sup> (90 days)        | 0.0001         |         |
| Fe(II,III)HA                                        | >0.05          | 0.0001  |
| Fe(II,III)HA (90 days)                              | 0.05           |         |
| Toxicity to plants <i>S. alba</i> (96 h EC50)       |                |         |
| HA*                                                 | 0.0001         | 0.0001  |
| HA* (90 days)                                       | 0.0001         |         |
| Fe <sup>2+</sup> /Fe <sup>3+</sup>                  | 0.0001         | 0.001   |
| Fe <sup>2+</sup> /Fe <sup>3+</sup> (90 days)        | 0.0001         |         |
| Fe(II,III)HA                                        | 0.0001         | >0.05   |
| Fe(II,III)HA (90 days)                              | 0.001          |         |
